# Supplementary material
Source: publisher figshare collection journal article supplement (https://geolsoc.figshare.com/articles/dataset/_/3454799)

***Example of regional uninterpreted seismic section across the Southeastern Structural Compartment of gravity tectonics in the Foz do Amazonas basin (the seismic section corresponds to that shown in figure 3B)***

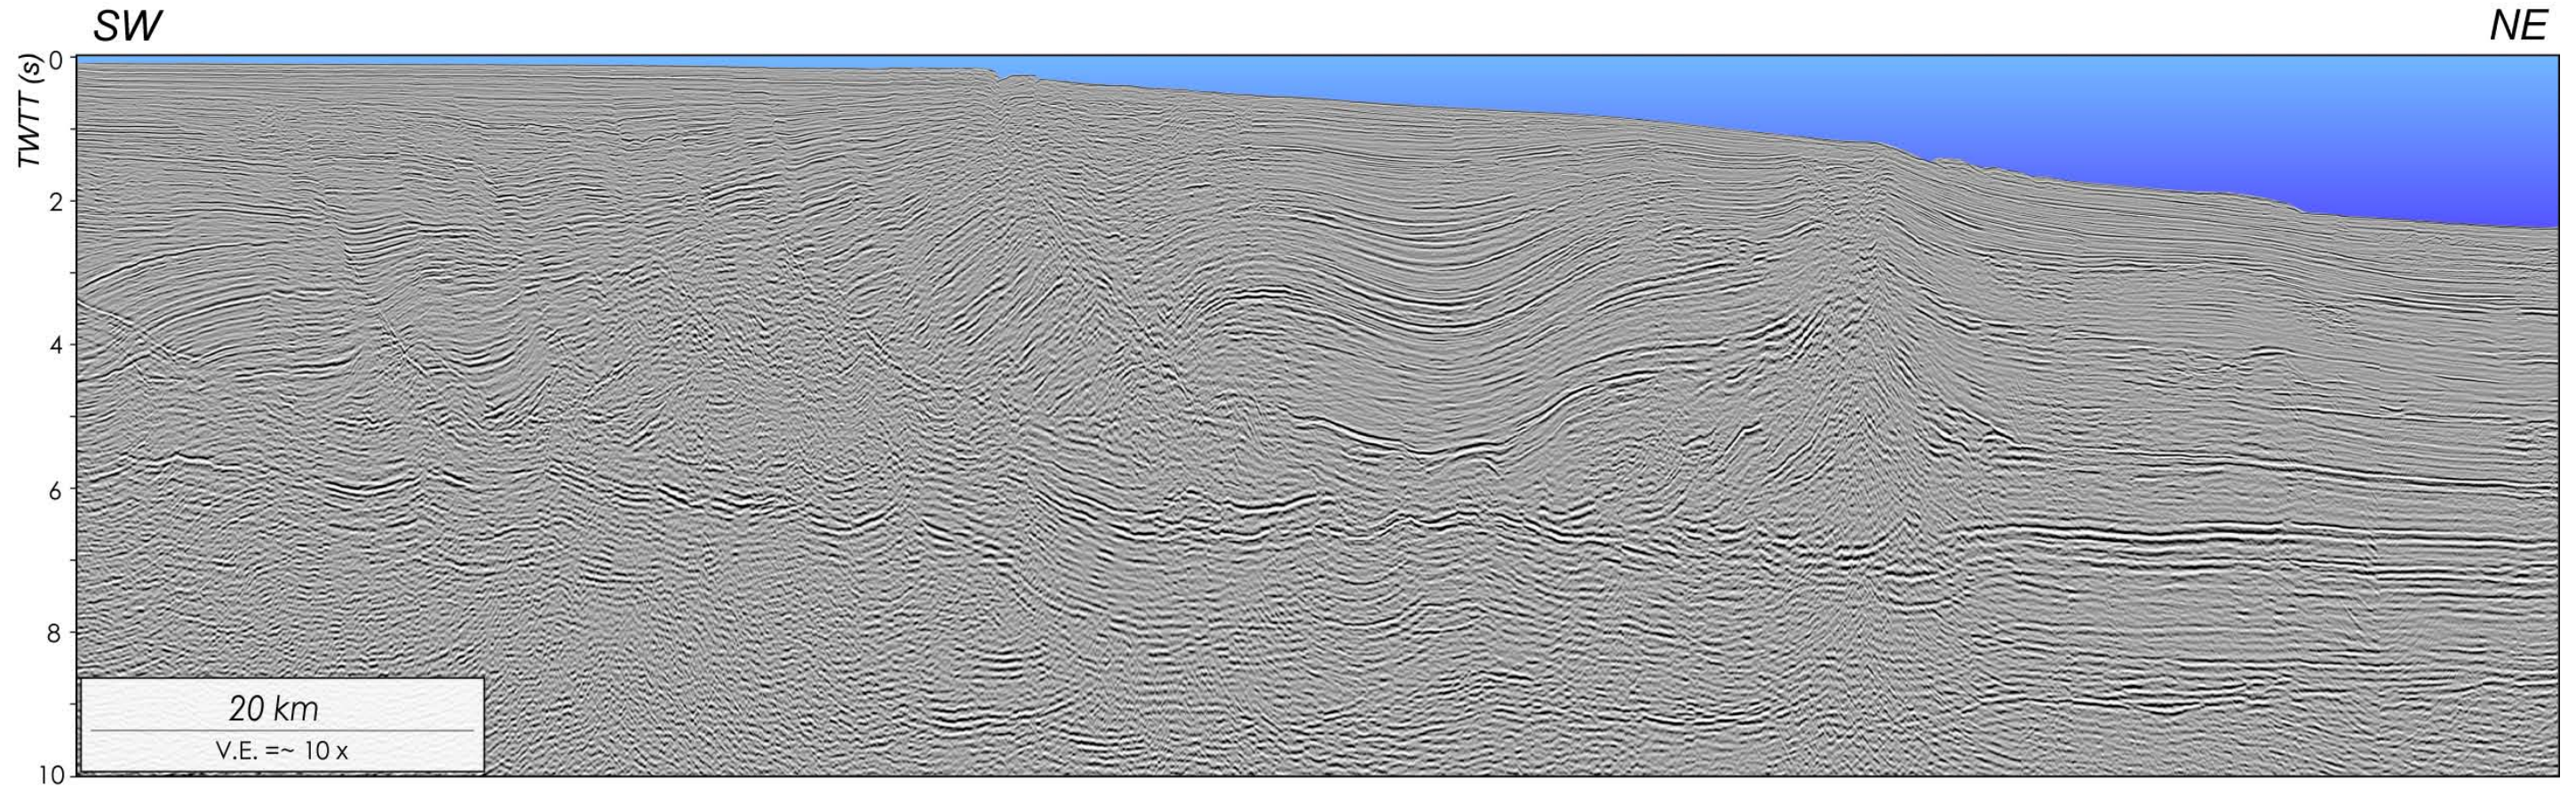

Supplement: Supplementary file 2 [file 1]
