# Supplementary material
Source: publisher figshare collection journal article supplement (https://geolsoc.figshare.com/articles/dataset/_/3454799)

**Zoom-ins of uninterpreted seismic sections across the gravitational fold-and-thrust belts in the Foz do Amazonas basin (seismic sections correspond to those shown in figure 5)**

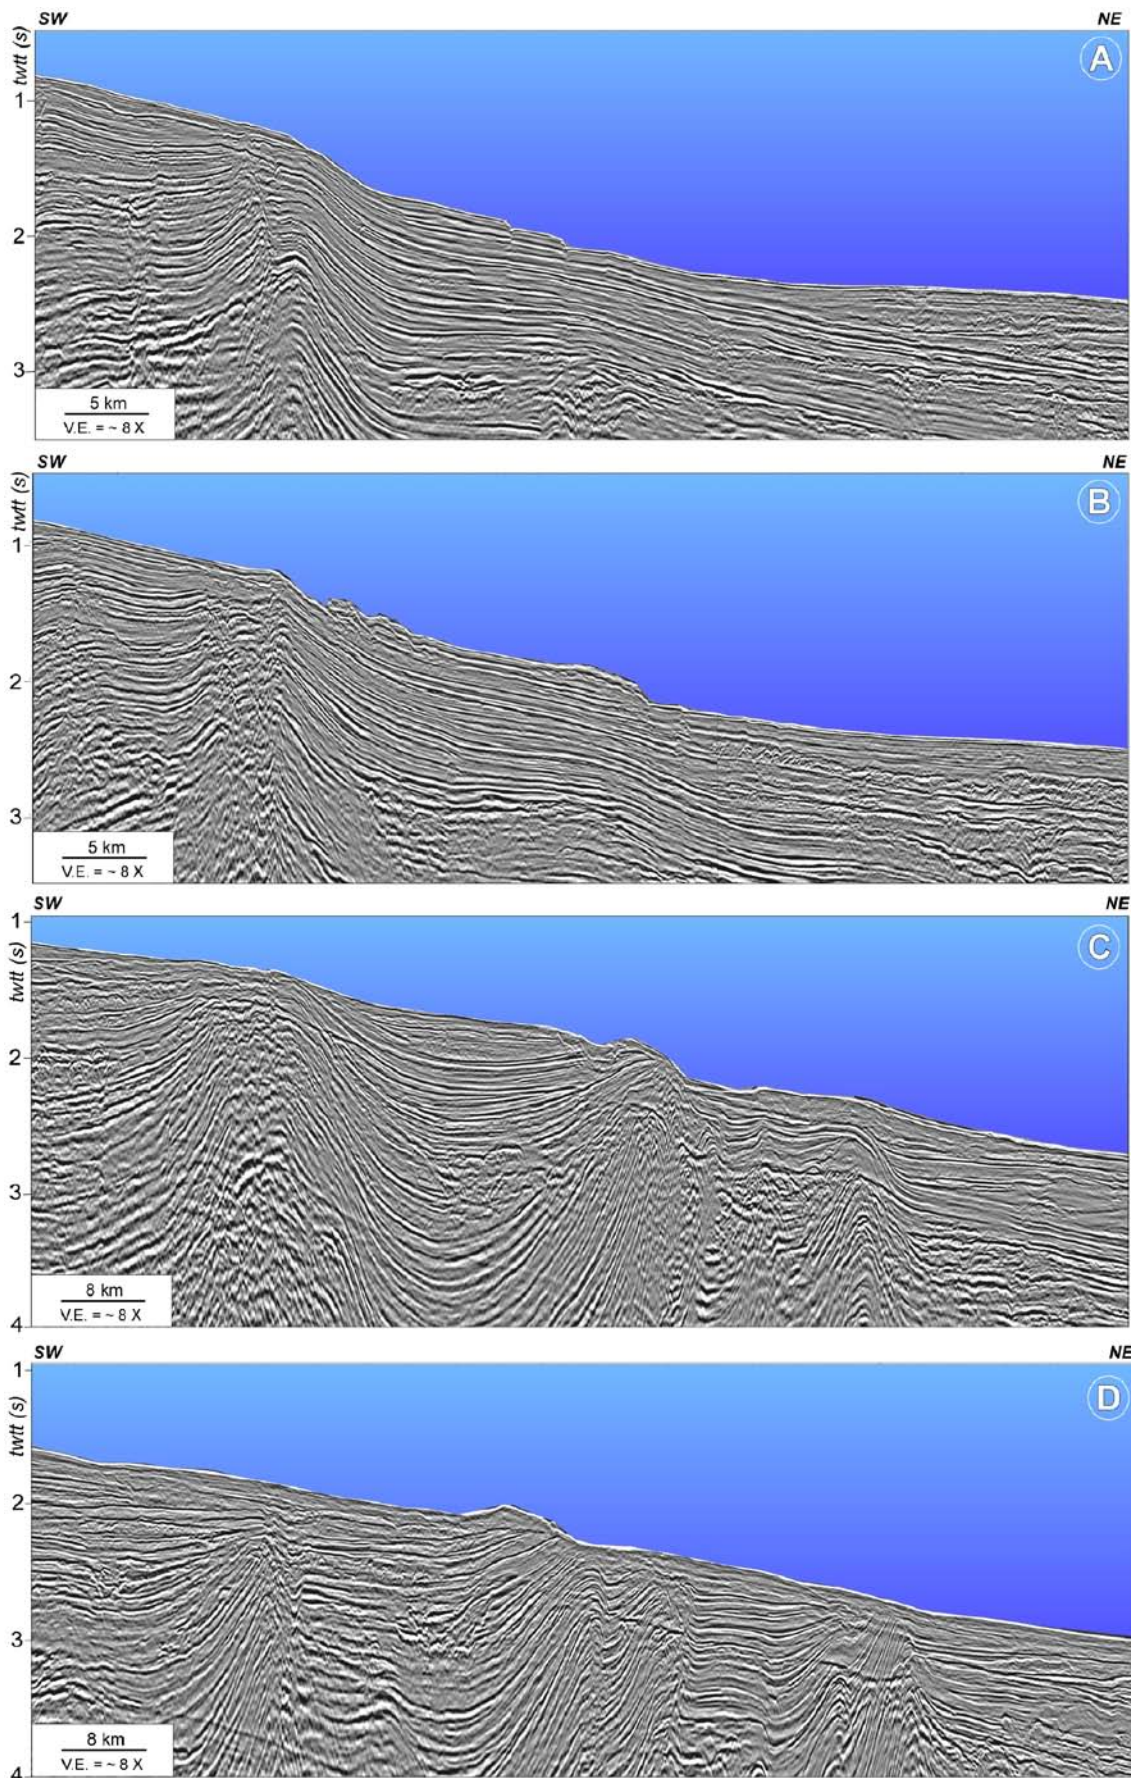

Supplement: Supplementary file 3 [file 1]
